# Supplementary material for: Coculture of bovine cartilage with synovium and fibrous joint capsule increases aggrecanase and matrix metalloproteinase activity
Source: Springer Nature journal article supplement (doi:10.1186/s13075-017-1318-9), 2017-07-05
Supplement: MOESM3 [file 13274992]

**Additional file 3**

**Bovine cartilage co-cultured with synovium and fibrous joint capsule increases aggrecanase and matrix metalloproteinase activity**

Per Sward, Yang Wang, Maria Hansson, L Stefan Lohmander, Alan J. Grodzinsky, André Struglics

**Table S1.** The release of aggrecan fragments into medium. Cartilage explants from the patellofemoral groove of six knees from three cows were cultured during 16 days. The mean accumulated amounts of total FFGV and ARGS-CS2 fragments, and G1-KEEE and G1-G3 aggrecan fragments from the two knees per cow is presented for each cow at each time-point for the analyzed conditions: A = uninjured cartilage, B = mechanically injured cartilage, C = uninjured cartilage co-cultured with synovium-joint capsule, D = mechanically injured cartilage co-incubated with synovium-joint capsule. AU, arbitrary units.

| FFGV<br>(ng/mg sGAG) | Condition A |        |        | Condition B |        |        | Condition C |        |        | Condition D |         |         |
|----------------------|-------------|--------|--------|-------------|--------|--------|-------------|--------|--------|-------------|---------|---------|
|                      | Days        | Cow 1  | Cow 2  | Cow 3       | Cow 1  | Cow 2  | Cow 3       | Cow 1  | Cow 2  | Cow 3       | Cow 1   | Cow 2   |
| 0.25                 | 31.81       | 28.91  | 17.92  | 34.25       | 20.45  | 17.88  | 39.15       | 23.37  | 28.94  | 64.87       | 65.04   | 83.99   |
| 1                    | 62.24       | 47.77  | 35.85  | 67.01       | 40.90  | 35.76  | 64.68       | 59.21  | 47.82  | 129.74      | 114.91  | 167.99  |
| 2                    | 62.24       | 56.57  | 53.77  | 78.93       | 72.26  | 63.18  | 90.21       | 70.11  | 75.51  | 179.47      | 147.43  | 232.38  |
| 4                    | 82.98       | 104.33 | 99.17  | 101.27      | 102.26 | 89.41  | 127.66      | 82.58  | 123.33 | 244.34      | 195.12  | 293.98  |
| 6                    | 103.73      | 169.70 | 152.94 | 123.60      | 154.07 | 196.70 | 345.52      | 93.49  | 179.96 | 374.08      | 244.99  | 358.37  |
| 8                    | 207.45      | 226.27 | 188.79 | 178.71      | 204.51 | 224.12 | 714.88      | 116.86 | 236.59 | 536.25      | 310.03  | 419.97  |
| 10                   | 269.69      | 255.18 | 224.63 | 257.63      | 265.86 | 277.76 | 1162.52     | 129.32 | 274.34 | 893.03      | 440.11  | 526.36  |
| 12                   | 311.18      | 282.83 | 260.48 | 357.41      | 327.22 | 313.53 | 1596.55     | 176.06 | 312.09 | 1476.85     | 780.49  | 629.95  |
| 14                   | 331.93      | 301.69 | 296.32 | 424.43      | 379.03 | 447.04 | 2005.06     | 199.44 | 349.85 | 1606.59     | 1025.47 | 1301.90 |
| 16                   | 342.99      | 311.74 | 322.61 | 481.02      | 409.02 | 482.81 | 2399.94     | 222.81 | 387.60 | 1898.50     | 1203.25 | 1450.29 |

| <b>ARGS-CS2</b><br>(ng/mg sGAG) | <b>Condition A</b> |            |          | <b>Condition B</b> |            |          | <b>Condition C</b> |            |          | <b>Condition D</b> |            |          |
|---------------------------------|--------------------|------------|----------|--------------------|------------|----------|--------------------|------------|----------|--------------------|------------|----------|
|                                 | <b>Days</b>        | <b>Cow</b> |          |                    | <b>Cow</b> |          |                    | <b>Cow</b> |          |                    | <b>Cow</b> |          |
|                                 | <b>1</b>           | <b>2</b>   | <b>3</b> | <b>1</b>           | <b>2</b>   | <b>3</b> | <b>1</b>           | <b>2</b>   | <b>3</b> | <b>1</b>           | <b>2</b>   | <b>3</b> |
| 0.25                            | 0.00               | 0.00       | 0.00     | 0.00               | 0.00       | 0.00     | 0.00               | 0.00       | 0.00     | 0.00               | 0.00       | 0.00     |
| 1                               | 0.00               | 0.00       | 0.00     | 0.00               | 0.00       | 0.00     | 0.00               | 0.00       | 0.00     | 0.00               | 0.00       | 0.00     |
| 2                               | 0.00               | 0.00       | 0.00     | 0.00               | 0.00       | 0.00     | 0.00               | 0.00       | 0.00     | 0.00               | 0.00       | 0.00     |
| 4                               | 0.00               | 0.00       | 0.00     | 0.00               | 0.00       | 0.00     | 0.00               | 0.00       | 0.00     | 0.00               | 0.00       | 0.00     |
| 6                               | 0.00               | 0.00       | 0.00     | 0.00               | 0.00       | 0.00     | 0.00               | 0.00       | 0.00     | 0.00               | 0.00       | 1030.32  |
| 8                               | 0.00               | 0.00       | 0.00     | 0.00               | 0.00       | 0.00     | 0.00               | 316.29     | 0.00     | 730.86             | 292.68     | 1786.26  |
| 10                              | 0.00               | 0.00       | 0.00     | 0.00               | 0.00       | 0.00     | 0.00               | 550.01     | 0.00     | 1070.34            | 570.19     | 1786.26  |
| 12                              | 0.00               | 0.00       | 0.00     | 0.00               | 0.00       | 0.00     | 0.00               | 830.46     | 330.97   | 1070.34            | 570.19     | 1786.26  |
| 14                              | 0.00               | 0.00       | 0.00     | 0.00               | 0.00       | 0.00     | 0.00               | 830.46     | 1350.31  | 1070.34            | 845.53     | 2729.79  |
| 16                              | 0.00               | 0.00       | 0.00     | 0.00               | 0.00       | 0.00     | 0.00               | 1378.91    | 3426.73  | 1070.34            | 845.53     | 2729.79  |
| <b>G1-KEEE</b><br>(AU/mg sGAG)  | <b>Condition A</b> |            |          | <b>Condition B</b> |            |          | <b>Condition C</b> |            |          | <b>Condition D</b> |            |          |
| <b>Days</b>                     | <b>Cow</b>         |            |          | <b>Cow</b>         |            |          | <b>Cow</b>         |            |          | <b>Cow</b>         |            |          |
|                                 | <b>1</b>           | <b>2</b>   | <b>3</b> | <b>1</b>           | <b>2</b>   | <b>3</b> | <b>1</b>           | <b>2</b>   | <b>3</b> | <b>1</b>           | <b>2</b>   | <b>3</b> |
| 0.25                            | 0.01               | 0.03       | 0.01     | 0.18               | 0.04       | 0.01     | 0.14               | 0.13       | 0.05     | 1.77               | 0.86       | 0.73     |
| 1                               | 0.05               | 0.08       | 0.01     | 0.28               | 0.07       | 0.01     | 0.48               | 0.47       | 0.16     | 2.52               | 1.37       | 1.23     |
| 2                               | 0.12               | 0.15       | 0.02     | 0.46               | 0.13       | 0.01     | 0.54               | 1.03       | 0.50     | 4.01               | 2.35       | 2.07     |
| 4                               | 0.26               | 0.30       | 0.08     | 0.90               | 0.26       | 0.03     | 2.24               | 2.28       | 2.32     | 11.50              | 5.12       | 4.00     |
| 6                               | 0.36               | 0.49       | 0.12     | 1.15               | 0.37       | 0.04     | 3.51               | 3.80       | 3.47     | 20.08              | 7.89       | 6.25     |
| 8                               | 0.45               | 0.86       | 0.17     | 1.34               | 0.47       | 0.06     | 4.52               | 5.18       | 4.37     | 24.00              | 10.14      | 8.64     |
| 10                              | 0.54               | 1.10       | 0.21     | 1.58               | 0.54       | 0.08     | 5.02               | 6.32       | 5.05     | 28.14              | 12.38      | 10.71    |
| 12                              | 0.73               | 1.31       | 0.26     | 1.84               | 0.62       | 0.10     | 6.44               | 7.39       | 5.76     | 32.78              | 15.51      | 13.02    |
| 14                              | 0.83               | 1.41       | 0.29     | 2.01               | 0.70       | 0.10     | 7.96               | 8.16       | 6.97     | 37.05              | 16.81      | 14.93    |
| 16                              | 0.91               | 1.51       | 0.31     | 2.12               | 0.74       | 0.10     | 8.87               | 8.83       | 10.20    | 41.04              | 18.38      | 15.94    |
| <b>G1-G3</b><br>(ng/mg sGAG)    | <b>Condition A</b> |            |          | <b>Condition B</b> |            |          | <b>Condition C</b> |            |          | <b>Condition D</b> |            |          |
| <b>Days</b>                     | <b>Cow</b>         |            |          | <b>Cow</b>         |            |          | <b>Cow</b>         |            |          | <b>Cow</b>         |            |          |
|                                 | <b>1</b>           | <b>2</b>   | <b>3</b> | <b>1</b>           | <b>2</b>   | <b>3</b> | <b>1</b>           | <b>2</b>   | <b>3</b> | <b>1</b>           | <b>2</b>   | <b>3</b> |
| 0.25                            | 138.3              | 0.0        | 358.5    | 446.8              | 136.3      | 1192.1   | 0.0                | 0.0        | 377.5    | 216.2              | 0.0        | 2799.8   |
| 1                               | 276.6              | 0.0        | 1194.8   | 1489.2             | 136.3      | 1192.1   | 0.0                | 0.0        | 1258.4   | 432.5              | 0.0        | 2799.8   |
| 2                               | 0.0                | 1257.0     | 1194.8   | 1489.2             | 1363.4     | 2384.2   | 170.2              | 1558.1     | 2516.9   | 2162.3             | 2168.0     | 2799.8   |
| 4                               | 1383.0             | 3771.1     | 3584.5   | 2978.4             | 8180.5     | 4768.5   | 1702.1             | 1558.1     | 3775.3   | 2162.3             | 6504.1     | 5599.6   |
| 6                               | 4149.1             | 6285.2     | 5974.2   | 2978.4             | 14997.5    | 8344.8   | 3404.2             | 3116.2     | 5033.8   | 4324.6             | 8672.1     | 5599.6   |
| 8                               | 5532.1             | 10056.3    | 8363.9   | 4467.6             | 21814.6    | 11921.2  | 5106.3             | 4674.3     | 6292.2   | 4324.6             | 13008.1    | 8399.4   |
| 10                              | 8298.2             | 12570.3    | 9558.7   | 4467.6             | 28631.6    | 14305.4  | 6808.3             | 6232.4     | 8809.1   | 4324.6             | 15176.2    | 8399.4   |
| 12                              | 11064.2            | 15084.4    | 11948.4  | 4467.6             | 35448.7    | 16689.6  | 8510.4             | 7790.5     | 10067.5  | 6486.9             | 21680.2    | 8399.4   |
| 14                              | 12447.3            | 17598.4    | 14338.1  | 5956.9             | 40902.3    | 19073.8  | 10212.5            | 7790.5     | 10067.5  | 8649.2             | 28184.3    | 11199.1  |
| 16                              | 12447.3            | 18855.5    | 15533.0  | 7446.1             | 43629.1    | 20266.0  | 10212.5            | 7790.5     | 11326.0  | 8649.2             | 34688.3    | 11199.1  |
